# Supplementary material
Source: PubMed Central journal article supplement (PMC3181142)
Supplement: NIHMS322278-supplement-01.pdf [file NIHMS322278-supplement-01.pdf]

## Supplemental Figure Legends

**Supplemental Figure 1. Representative markers distributed across chromosomes 1-6 confirm B6 genetic background of BCMA<sup>-/-</sup> mice.** Genotyping was performed using a panel of polymorphic microsatellite markers distributed across the entire genome to confirm B6 genetic background of BCMA<sup>-/-</sup> mice (Supplemental Table I). The PCR products of all markers were separated on 4% agarose gels. **Markers are representative of 5 mice for each genotype.**

**Supplemental Figure 2. IgG-secreting PCs from BCMA<sup>-/-</sup> *lpr* mice produce mainly IgG<sub>2a</sub>, IgG<sub>2b</sub>, and IgG<sub>3</sub>.** Sort-purified B cells (B220<sup>+</sup> CD138<sup>-</sup>) and PCs (B220<sup>+</sup> CD138<sup>+</sup>) from spleens and cervical LNs of 4-mo-old BCMA<sup>-/-</sup> *lpr* mice were analyzed for secretion of the indicated IgG isotype by ELISPOT. Data are expressed as the mean ± SEM from 6 mice.

**Supplemental Figure 3. Levels of membrane BAFF-R and TACI expressed on B cells, GC B cells, and PCs are equivalent among all mouse strains.** Representative FACS plots demonstrate equivalent membrane expression of BAFF-R and TACI on splenic B cells (B220<sup>+</sup> CD138<sup>-</sup> CD3<sup>-</sup>), GC B cells (B220<sup>+</sup> GL7<sup>+</sup> IgD<sup>-</sup> CD3<sup>-</sup>), and total PCs (CD138<sup>+</sup> IgD<sup>-</sup> CD3<sup>-</sup>) among all mouse strains. FMO, fluorescence-minus-one control. Data are representative of >6 4-mo old mice for each genotype.

**Supplemental Figure 4. Quantified protein levels of NF-κB transcription factors after BCR and BAFF stimulation.** Immunoblot analysis of cytoplasmic extracts prepared from 24 hr stimulated cells was performed using antibodies against p100, p52, and β-actin. Nuclear extracts were probed with antibodies recognizing p52, p65, and HDAC1. Densitometry values of p100 and p52 within cytoplasmic extracts relative to β-actin, and p52 within nuclear extracts relative to HDAC1, in each sample were determined. Shown is the mean ± SEM fold change expression

of p100 and p52 within stimulated B cells calculated relative to steady-state, nonstimulated levels in B cells from B6 mice. Fold changes of p65 with nuclear extracts of stimulated B cells of each genotype were calculated relative to the steady-state, nonstimulated amount of same genotype. n = 3 4-mo old mice per group from 3 individual experiments.

**Supplemental Figure 5. B cells from BCMA<sup>-/-</sup> *lpr* mice proliferate equivalently to BAFF and APRIL stimulation.** B cells (B220<sup>+</sup> CD138<sup>-</sup> CD3<sup>-</sup>) isolated from spleens of 4-mo-old mice were labeled with CFSE and cultured 72 hrs in medium ± 0.1 µg/ml murine recombinant BAFF and APRIL. Cells were recovered and the percent divided B cells were determined by flow cytometry. Data are representative of two experiments.

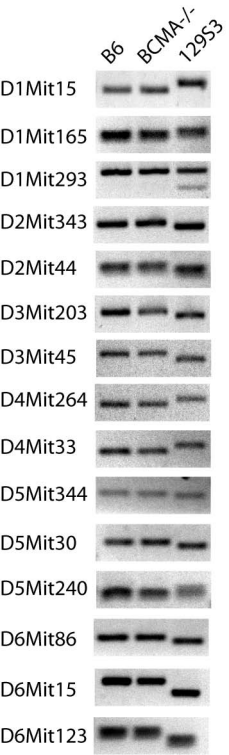

ASC number (per 10<sup>4</sup> input cells)

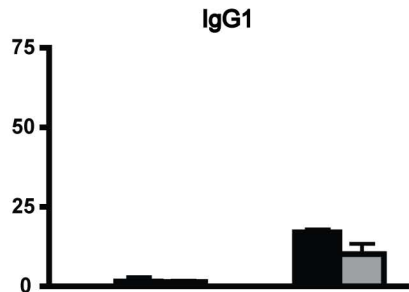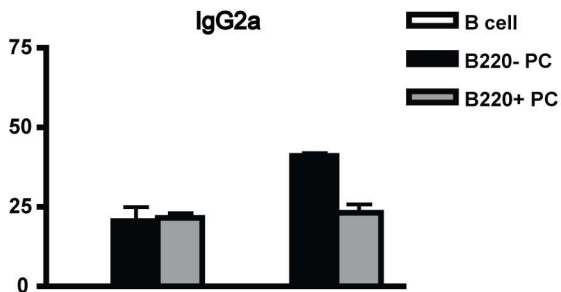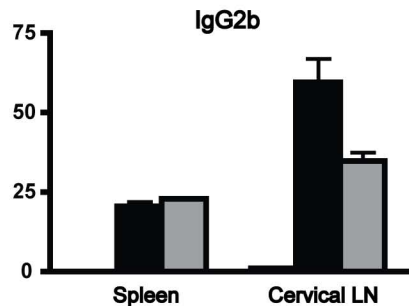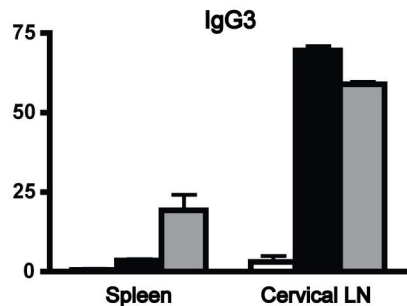

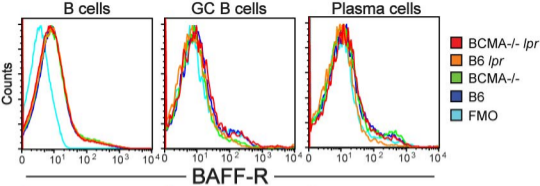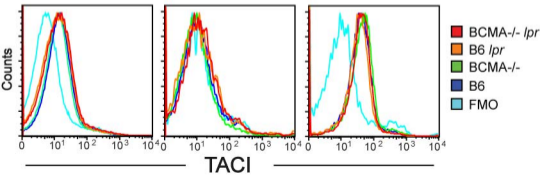

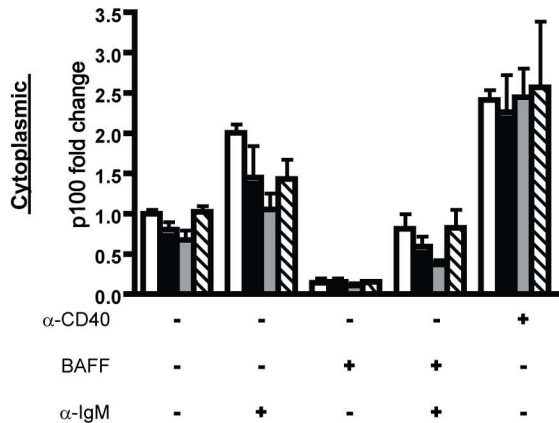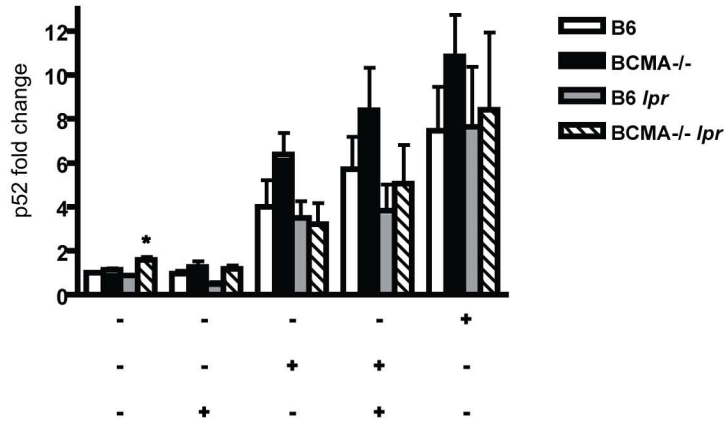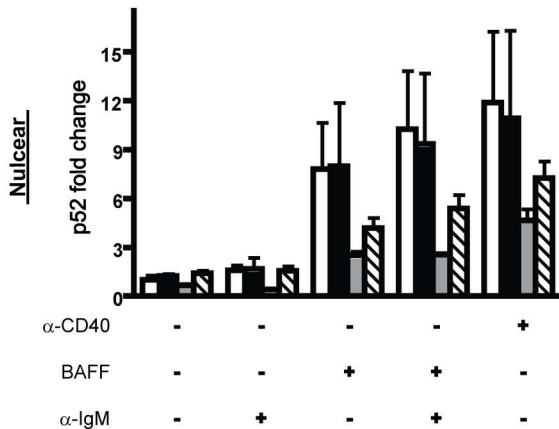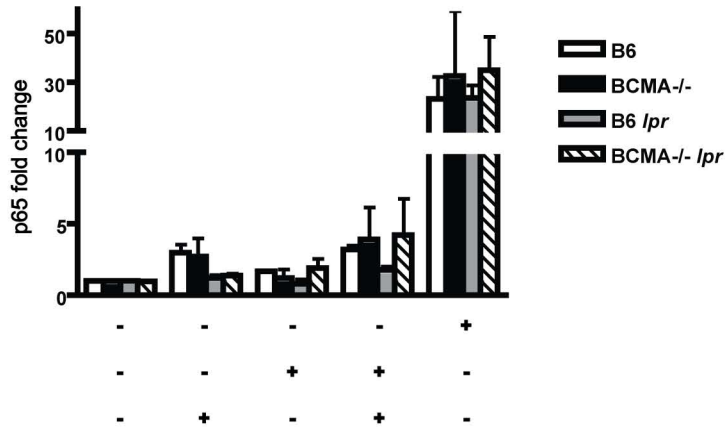

72 hrs

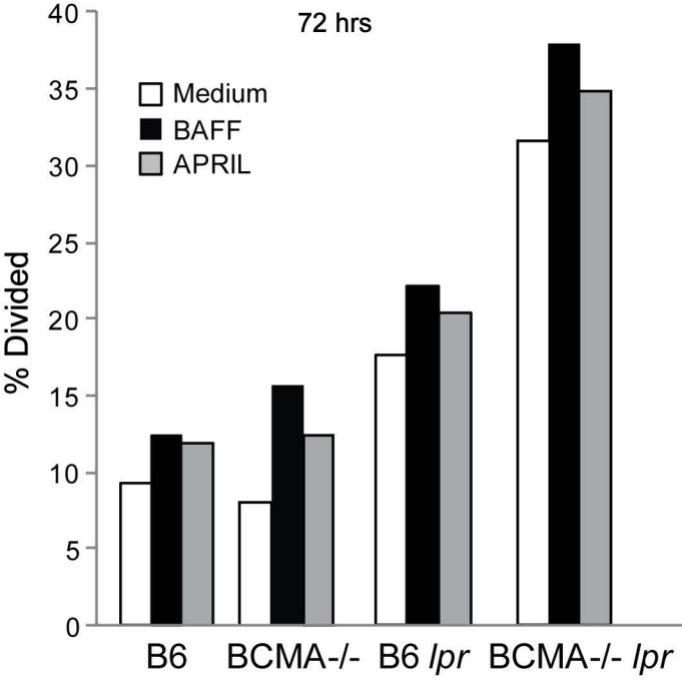

□ Medium

■ BAFF

■ APRIL

% Divided

B6

BCMA<sup>-/-</sup>

B6 *lpr*

BCMA<sup>-/-</sup> *lpr*

| Microsatellite markers used for genotyping of Nba2 congenic region.          |               |                           |                           |
|------------------------------------------------------------------------------|---------------|---------------------------|---------------------------|
| Marker                                                                       | Mb (NCBI m37) | 3' Primer                 | 5' Primer                 |
| D1Mit196                                                                     | 150.6         | AAAAATGAGGTGCTATTGAAAAGC  | TTATGCATCAAACCAAATCTCA    |
| D1Mit47                                                                      | 154.8         | CTGACCTCCACACGACCC        | GCTTGGGAAACTGGATGAAA      |
| D1Mit105                                                                     | 162.4         | TGGGTATCACCTCCAGAATACA    | AGGTATGGTGAAGACAACAAAATG  |
| D1Mit36                                                                      | 171.1         | GAGGAATGTAGAGTCCAACCTGG   | TGAATAGATTAAGAGCCTGGAAGC  |
| D1Mit166                                                                     | 178.4         | GATGAAGTGAAAATGATCCTTGC   | TATCTTTTGTGGACTCGGGG      |
| D1Mit209                                                                     | 193.3         | TCCATCCATACTCCTGTCTGC     | CAAGGACTAGGGCTGTCACTG     |
| D1Mit510                                                                     | 194.2         | TTCAGGTTAATTCTACAAACAAGCA | TCAAAATATCATGCTGTATACCATG |
| Polymorphic microsatellite markers used for genotyping of B6:129 background. |               |                           |                           |
| Marker                                                                       | Mb (NCBI m36) | B6 Product Size (bp)      | 129S3 Product Size (bp)   |
| D1Mit15                                                                      | 170.1         | 159                       | 180                       |
| D1Mit165                                                                     | 100.0         | 147                       | 155                       |
| D1Mit293                                                                     | 194.6         | 151                       | 116                       |
| D2Mit44                                                                      | 105.1         | 148                       | 139                       |
| D2Mit343                                                                     | 167.9         | 151                       | 143                       |
| D3Mit203                                                                     | 27.1          | 153                       | 144                       |
| D3Mit212                                                                     | 83.4          | 122                       | 126                       |
| D3Mit45                                                                      | 148.0         | 146                       | 134                       |
| D4Mit264                                                                     | 9.3           | 127                       | 135                       |
| D4Mit33                                                                      | 149.0         | 125                       | 141                       |
| D5Mit344                                                                     | 5.3           | 111                       | 107                       |
| D5Mit30                                                                      | 129.8         | 147                       | 135                       |
| D5Mit240                                                                     | 109.3         | 152                       | 169                       |
| D6Mit86                                                                      | 4.4           | 130                       | 119                       |
| D6Mit15                                                                      | 145.6         | 140                       | 135                       |
| D6Mit123                                                                     | 17.5          | 118                       | 98                        |
| D7Mit340                                                                     | 4.2           | 110                       | 140                       |
| D7Mit15                                                                      | 144.0         | 135                       | 129                       |
| D8Mit155                                                                     | 4.9           | 148                       | 96                        |
| D8Mit93                                                                      | 130.1         | 168                       | 162                       |
| D9Mit57                                                                      | 7.6           | 164                       | 172                       |
| D9Mit151                                                                     | 121.3         | 128                       | 116                       |
| D10Mit2                                                                      | 21.2          | 121                       | 127                       |
| D10Mit35                                                                     | 121.6         | 228                       | 240                       |
| D11Mit71                                                                     | 6.8           | 211                       | 193                       |
| D11Mit48                                                                     | 117.9         | 134                       | 128                       |
| D12Mit182                                                                    | 10.8          | 129                       | 146                       |
| D12Nds2                                                                      | 115.3         | 189                       | 172                       |
| D13Mit16                                                                     | 20.3          | 210                       | 176                       |
| D13Mit191                                                                    | 85.3          | 118                       | 138                       |
| D14Mit203                                                                    | 38.9          | 151                       | 170                       |
| D14Mit193                                                                    | 70.2          | 118                       | 129                       |
| D15Mit5                                                                      | 43.2          | 100                       | 128                       |
| D15Mit35                                                                     | 103.3         | 118                       | 122                       |
| D16Mit55                                                                     | 27.5          | 133                       | 115                       |
| D16Mit131                                                                    | 72.3          | 142                       | 178                       |
| D18Mit60                                                                     | 32.6          | 204                       | 189                       |
| D18Mit103                                                                    | 70.3          | 116                       | 91                        |
| D19Mit78                                                                     | 7.6           | 135                       | 142                       |
| D19Mit6                                                                      | 54.2          | 109                       | 113                       |
| DXMit166                                                                     | 47.9          | 115                       | 127                       |



**Supplemental Table II.** Absolute numbers of lymphocyte and myeloid cells in spleens and cervical LNs of naïve animals.

| Cell number (x10 <sup>6</sup> ) |                                                                                       | B6          | BCMA <sup>-/-</sup> | B6 <i>lpr</i> | BCMA <sup>-/-</sup> <i>lpr</i> |
|---------------------------------|---------------------------------------------------------------------------------------|-------------|---------------------|---------------|--------------------------------|
| <b>Spleen</b>                   | Total                                                                                 | 61.63±17.52 | 61.52±23.38         | 67.30±38.89   | 288.85±119.46***               |
|                                 | B220 <sup>+</sup> CD138 <sup>-</sup> CD3 <sup>-</sup> (B cell)                        | 25.35±8.56  | 24.64±10.54         | 36.41±6.71    | 118.40±115.87*                 |
|                                 | B220 <sup>+</sup> IgD <sup>-</sup> GL7 <sup>+</sup> (GC B cell)                       | 0.15±0.03   | 0.65±0.15           | 1.06±0.82     | 10.26±7.75                     |
|                                 | B220 <sup>+</sup> AA4.1 <sup>-</sup> (Mature B cell)                                  | 18.65±4.62  | 28.22±10.11         | 15.68±9.78    | 75.39±35.36*                   |
|                                 | B220 <sup>+</sup> AA4.1 <sup>+</sup> CD23 <sup>-</sup> IgM <sup>+</sup> (T1 B cell)   | 0.59±0.03   | 0.44±0.15           | 0.67±0.59     | 0.20±0.08                      |
|                                 | B220 <sup>+</sup> AA4.1 <sup>+</sup> CD23 <sup>+</sup> IgM <sup>+</sup> (T2 B cell)   | 1.20±0.22   | 1.32±0.57           | 1.34±0.78     | 0.39±0.23                      |
|                                 | B220 <sup>+</sup> AA4.1 <sup>+</sup> CD23 <sup>+</sup> IgM <sup>low</sup> (T3 B cell) | 0.89±0.55   | 0.74±0.09           | 0.96±0.39     | 0.30±0.24                      |
|                                 | B220 <sup>+</sup> CD23 <sup>+</sup> CD21 <sup>low</sup> (FO B cell)                   | 20.52±7.72  | 20.17±7.82          | 19.34±4.87    | 39.61±46.08                    |
|                                 | B220 <sup>+</sup> CD23 <sup>+</sup> CD21 <sup>hi</sup> (MZ B cell)                    | 1.69±0.63   | 1.02±0.49           | 1.97±0.39     | 1.48±1.52                      |
|                                 | CD138 <sup>+</sup> (PC)                                                               | 1.40±0.93   | 2.34±1.05           | 3.42±2.20     | 52.82±44.29*                   |
|                                 | CD3 <sup>+</sup> CD4 <sup>+</sup> (CD4 T cell)                                        | 9.95±1.44   | 19.93±4.29          | 8.22±5.26     | 45.35±33.34                    |
|                                 | CD3 <sup>+</sup> CD4 <sup>+</sup> FoxP3 <sup>+</sup> (Treg)                           | 3.27±1.12   | 4.64±1.80           | 7.04±3.58     | 4.68±2.41                      |
|                                 | CD3 <sup>+</sup> CD8 <sup>+</sup> (CD8 T cell)                                        | 5.13±0.60   | 8.26±1.22           | 4.41±1.21     | 13.19±9.14                     |
|                                 | CD3 <sup>+</sup> CD4 <sup>-</sup> CD8 <sup>-</sup> (DN T cell)                        | 1.99±0.49   | 2.08±0.94           | 11.71±7.32    | 34.89±20.01*                   |
|                                 | CD11c <sup>+</sup> MHCII <sup>+</sup> (DC)                                            | 0.93±0.24   | 1.12±0.40           | 3.05±1.58     | 10.26±2.45*                    |
|                                 | NK1.1 <sup>+</sup> TCR-β <sup>-</sup> (NK cell)                                       | 1.92±0.02   | 1.28±0.03           | 2.62±0.19     | 2.48±0.65                      |
|                                 | F4/80 <sup>+</sup> CD11b <sup>+</sup> (Macrophage)                                    | 1.05±0.01   | 0.86±0.01           | 1.84±0.09     | 3.89±0.44                      |
| <b>Cervical LN</b>              | Total                                                                                 | 4.55±3.18   | 4.26±1.96           | 19.58±14.93   | 296.50±162.78**                |
|                                 | B220 <sup>+</sup> CD138 <sup>-</sup> CD3 <sup>-</sup> (B cell)                        | 1.59±1.29   | 1.84±1.32           | 14.40±17.39   | 123.19±82.36*                  |
|                                 | B220 <sup>+</sup> IgD <sup>-</sup> GL7 <sup>+</sup> (GC B cell)                       | 0.03±0.02   | 0.06±0.02           | 0.39±0.25     | 43.27±15.58**                  |
|                                 | CD138 <sup>+</sup> (PC)                                                               | 0.14±0.11   | 0.29±0.24           | 2.47±1.90     | 79.75±44.54**                  |
|                                 | CD3 <sup>+</sup> CD4 <sup>+</sup> (CD4 T cell)                                        | 1.60±1.09   | 1.27±0.84           | 6.10±7.27     | 93.25±75.18*                   |
|                                 | CD3 <sup>+</sup> CD4 <sup>+</sup> FoxP3 <sup>+</sup> (Treg)                           | 0.08±0.04   | 0.14±0.07           | 4.62±5.23     | 6.85±2.64                      |
|                                 | CD3 <sup>+</sup> CD8 <sup>+</sup> (CD8 T cell)                                        | 1.21±0.27   | 1.24±0.38           | 3.86±1.98     | 24.86±13.42**                  |
|                                 | CD3 <sup>+</sup> CD4 <sup>-</sup> CD8 <sup>-</sup> (DN T cell)                        | 0.15±0.25   | 0.11±0.11           | 20.58±28.35   | 84.31±43.30*                   |
|                                 | CD11c <sup>+</sup> MHCII <sup>+</sup> (DC)                                            | 0.036±0.044 | 0.027±0.009         | 0.627±0.602   | 5.576±4.620                    |
|                                 | NK1.1 <sup>+</sup> TCR-β <sup>-</sup> (NK cell)                                       | 0.021±0.015 | 0.027±0.019         | 0.192±0.111   | 0.649±0.257*                   |
|                                 | F4/80 <sup>+</sup> CD11b <sup>+</sup> (Macrophage)                                    | 0.009±0.007 | 0.007±0.003         | 0.095±0.062   | 0.442±0.097**                  |

Cell numbers shown are expressed as mean ± SEM. n = 3-6 mice per group. \*  $p < 0.05$ ; \*\*  $p < 0.01$ ; \*\*\*  $p < 0.001$  compared to all control strains
